# Supplementary material for: Caffeine Intake throughout Pregnancy, and Factors Associated with Non-Compliance with Recommendations: A Cohort Study
Source: MDPI journal article supplement (doi:10.3390/nu14245384), 2022-12-18
Supplement: s1 [file s1]

Table S1. Transformation of beverage and food in mg of caffeine.

| <b>Beverage/food</b>                      | <b>Volume</b>  | <b>Mg caffeine</b> |
|-------------------------------------------|----------------|--------------------|
| <b>Coffee<sup>a</sup></b>                 | 1 cup 150 ml   | 100mg              |
| <b>Decaffeinated coffee<sup>a</sup></b>   | 1 cup 150 ml   | 2mg                |
| <b>Tea<sup>a</sup></b>                    | 1 cup 150ml    | 39mg               |
| <b>Cola<sup>a</sup></b>                   | 1 bottle 200ml | 20mg               |
| <b>Energetic drinks<sup>b</sup></b>       | 1 bottle 200ml | 64mg               |
| <b>Chocolate without milk<sup>c</sup></b> | 1 square 28g   | 23mg               |
| <b>Chocolate with milk<sup>c</sup></b>    | 1 square 28g   | 6mg                |

Adapted from: <sup>a</sup>Li et al., 2015; <sup>b</sup><http://energydrink-es.redbull.com/cafeina-en-red-bull>; <sup>c</sup>Cnattingius *et al.*, 2000
